# Supplementary material
Source: PubMed Central journal article supplement (PMC4003379)
Supplement: cmi201358x1.pdf [file cmi201358x1.pdf]

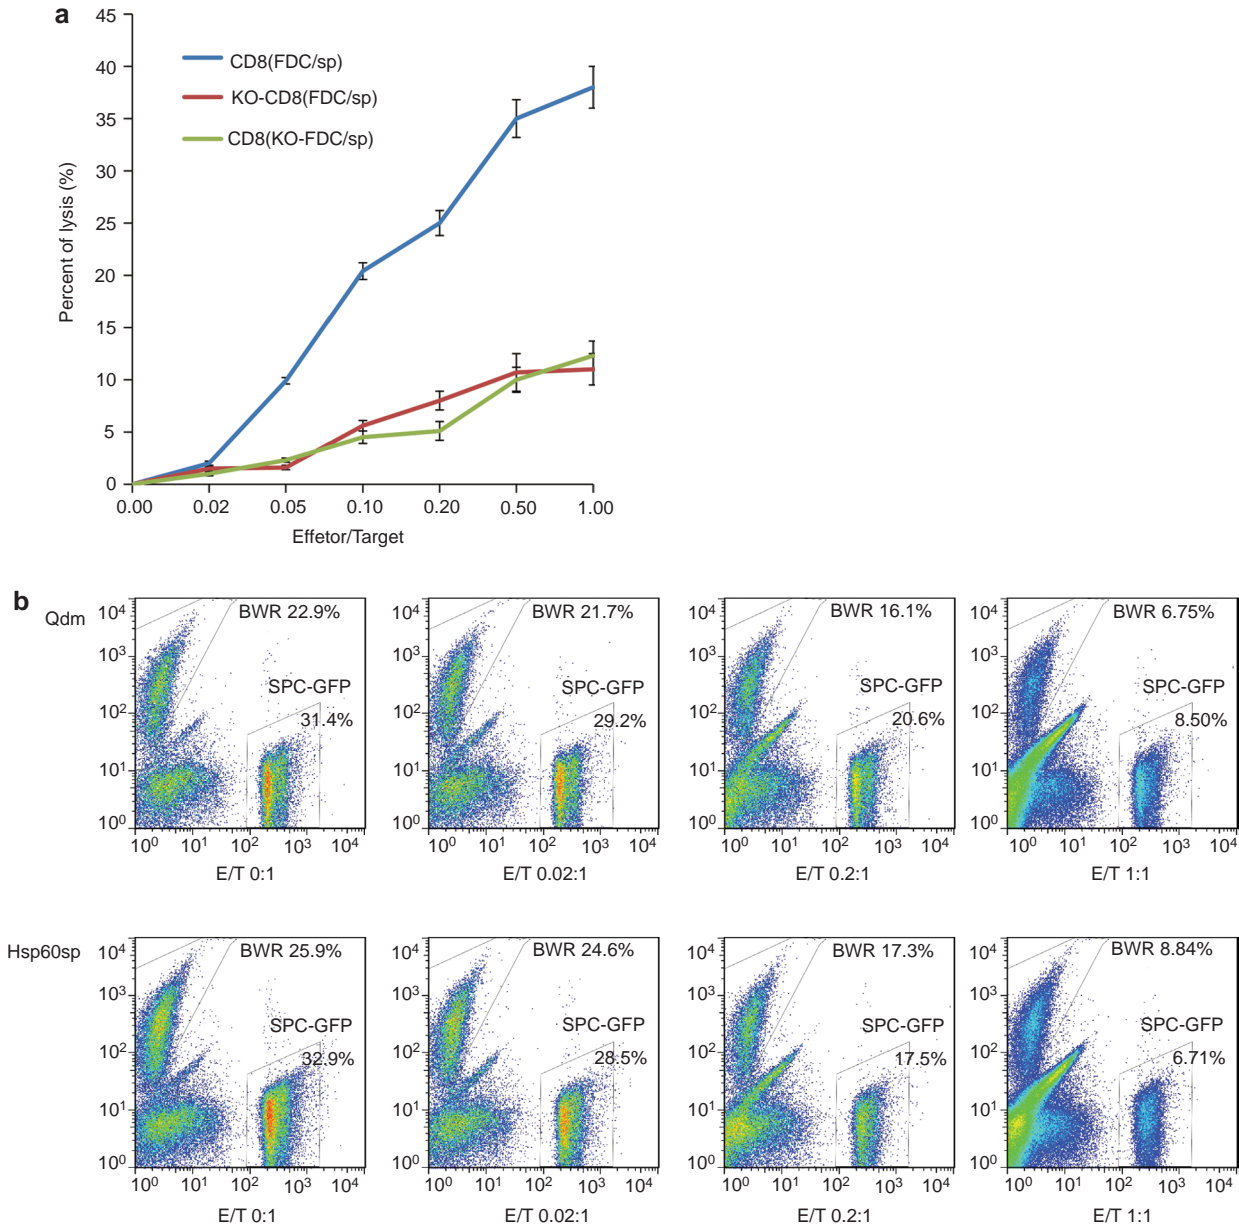

**Supplemental Figure 1** (a) CD8<sup>+</sup> T effector cells stimulated by FDC/sp are Qa-1-restricted. CD8<sup>+</sup> T-cell lines were generated either by priming the CD8<sup>+</sup> T cells from the WT mice with the FDC/sp from the Qa-1 KO mice, or by priming the CD8<sup>+</sup> T cells from the Qa-1/KO mice with the FDC/sp from the WT mice. The cell functions were tested and compared for the specific inhibition of the target cells loaded with Hsp60sp. CD8<sup>+</sup> T-cell lines were generated by priming the CD8<sup>+</sup> T cells from WT mice and the FDC/sp from the WT mice served as a control. The assay was performed as described in the section on 'Materials and methods'. The data are representative of three independent experiments. (b) The representative FACS plots show that CD8<sup>+</sup> T cells inhibit GFP cells loaded with Hsp60sp but not Qdm. DC/sp, Hsp60sp-loaded immature dendritic cells; FACS, fluorescence-activated cell sorting; FDC/sp, fixed Hsp60sp-loaded immature dendritic cells; GFP, green fluorescent protein; KO, knockout; WT, wild-type.

**Supplemental Table 1 A summary of representative lysis assays**

| <i>Group</i>              | <i>E/T ratio</i> |               |              |            |
|---------------------------|------------------|---------------|--------------|------------|
|                           | <i>0:1</i>       | <i>0.02:1</i> | <i>0.2:1</i> | <i>1:1</i> |
| Target/internal (GFP/BWR) |                  |               |              |            |
| Qdm                       | 1.37             | 1.35          | 1.28         | 1.26       |
| Hsp60sp                   | 1.27             | 1.16          | 1.01         | 0.76       |
| % of killing              |                  |               |              |            |
| Qdm                       | 0                | 1.5           | 6.6          | 8.0        |
| Hsp60sp                   | 0                | 8.0           | 20.5         | 40.2       |

Abbreviation: GFP, green fluorescent protein.

The percentage of killing was calculated as described in the section on 'Materials and methods'.
